# Supplementary material for: Resminostat induces changes in epithelial plasticity of hepatocellular carcinoma cells and sensitizes them to sorafenib-induced apoptosis
Source: PubMed Central journal article supplement (PMC5746389; doi:10.18632/oncotarget.22775), 2017-11-30
Supplement: oncotarget-08-110367-s001.pdf [file oncotarget-08-110367-s001.pdf]

# Resminostat induces changes in epithelial plasticity of hepatocellular carcinoma cells and sensitizes them to sorafenib-induced apoptosis

## SUPPLEMENTARY MATERIALS

### Characteristics of human HCC cell lines used in the study

| Cell line | Tumor type                          | Morphology                | Differentiation grade | TP53 status               | HBV        | Other characteristics                                    |
|-----------|-------------------------------------|---------------------------|-----------------------|---------------------------|------------|----------------------------------------------------------|
| Hep3B     | Human negroid hepatocarcinoma       | Epithelial                | Well differentiated   | Deleted                   | Integrated | Deficient in functional RB1; mutations within <i>FAS</i> |
| HLE       | Human hepatoma (non differentiated) | Diffusely spreading cells | Poorly differentiated | Mutated G244A R249S V272M | Negative   | -                                                        |
| HLF       | Human liver hepatocarcinoma         | Diffusely spreading cells | Poorly differentiated | Mutated p.G244A           | Negative   | -                                                        |

### Immunofluorescence studies in 2d

For F-actin, cells were fixed with 4% paraformaldehyde (PFA) in PBS for 30 min at room temperature, incubated with a blocking solution (1% BSA, 10% FBS) before addition of the primary antibody (1:500 dilution, 1 h, room temperature). For VIMENTIN, E-CADHERIN and ZO-1, cells were fixed with methanol (100%; -20°C, 2 min), incubated with blocking solution and cultivated with primary antibodies diluted in 1% BSA (1:50 dilution, 1 h, room temperature). After primary antibody incubation, cells were washed several times with PBS, incubated with Alexa Fluor 488-conjugated anti-rabbit or Alexa Fluor 488-conjugated anti-mouse (1:1000 dilution, 1 h, room temperature) and mounted with Vectashield mounting medium. Cells were visualized with a Nikon eclipse 80i microscope. Representative images were taken with a Nikon DS-R1 digital camera and edited in Adobe Photoshop.

### Immunofluorescence in cells cultured on thick layers of collagen i

Cells were fixed during 15 min at room temperature by adding 50  $\mu$ L of PFA 12% to cells seeded on 100  $\mu$ L of matrix (final concentration of PFA is 4% considering collagen matrix volume) and washed 3 times with PBS during 5 minutes. Afterwards, cells were permeabilized during 10 min using a solution containing 0.2% Triton X-100 in PBS-BSA 5% and washed again 3 times with PBS

during 5 min. Next, samples were blocked in a PBS-BSA 5% solution during 20 min. For F-actin cells were stained during 1 h at room temperature with Alexa Fluor 546-phalloidin probe diluted 1:500 in blocking solution, and washed again 5 times with PBS during 5 min. During the second last wash nuclei were stained with a DAPI solution 1:200.

### Western blot analysis

Total protein extracts were obtained using a lysis buffer containing 30 mM Tris-HCl pH 7.5, 5 mM EDTA, 150 mM NaCl, 1% Triton X-100, 0.5% sodium deoxycholate, 0.1% SDS and 10% glycerol (1 h at 4°C; centrifugation at 13,000 rpm, 10 min, 4°C). Protein concentration was measured with the BCA Protein Assay kit (Pierce).  $\beta$ -ACTIN is shown as a loading control. Antibodies were used at a 1:1000 dilution, except for  $\beta$ -ACTIN (1:3000). Images were processed with Adobe Photoshop CS5.

### List of primers

Real-time quantitative PCR reactions were performed using the following human specific primers designed by Integrated DNA Technologies (IDT):

**L32** Forward: 5'-AACGTCAAGGAGCTGGAAG-3'

Reverse: 5'-GGGTTGGTGACTCTGATGG-3'

**CDH1** Forward: 5'-CCCAATACATCTCCCTTCACAG-3'

## List of antibodies used in the study

| Primary antibody           | Secondary antibody | Company        | Reference code | Application |
|----------------------------|--------------------|----------------|----------------|-------------|
| E-CADHERIN                 | Anti-mouse         | BD Biosciences | BD-610182      | IF, WB      |
| VIMENTIN                   | Anti-mouse         | Sigma-Aldrich  | V6630          | IF, WB      |
| ZO-1                       | Anti-rabbit        | Invitrogen     | 61-7300        | IF          |
| F-ACTIN                    | TRITC-conjugated   | Sigma-Aldrich  | P1951          | IF          |
| β-ACTIN                    | Anti-mouse         | Sigma-Aldrich  | A5441          | WB          |
| PARP                       | Anti-rabbit        | Cell Signaling | 9542           | WB          |
| phospho-p42/44<br>MAPK     | Anti-rabbit        | Cell Signaling | 9101           | WB          |
| Secondary antibody         | Company            | Reference code | Application    |             |
| Alexa 488 goat anti mouse  | Life Technologies  | A11001         | IF             |             |
| Alexa 488 goat anti rabbit | Life Technologies  | A11008         | IF             |             |
| Anti-mouse                 | GE Healthcare      | NA931V         | WB             |             |
| Anti-rabbit                | GE Healthcare      | NA934V         | WB             |             |

IF: Immunofluorescence; WB: Western Blot;

Reverse 5'-CCACCTCTAAGGCCATCTTTG-3'  
**VIM** Forward: 5'-GGAAGCCTAACTACAGCGAG  
 -3'  
 Reverse: 5'-CAGAGTCCCAGATGAGCATTG-3'  
**SNAI1** Forward:  
 5'-GCTGCAGGACTCTAATCCAGAGTT-3'  
 Reverse:  
 5'-GACAGAGTCCCAGATGAGCATTG-3'  
**SNAI2** Forward: 5'-  
 ACACATTAGAACTCACACGGG-3'  
 Reverse: 5'-TGGAGAAGTTTTGGAGCAG-3'  
**ZEB1** Forward:  
 5'-ACCCTTGAAAGTGATCCAGC-3'  
 Reverse: 5'-CATTCCATTTCTGTCTTCCGC-3'

**TWIST1** Forward:  
 5'-CTCAGCTACGCCTTCTCG-3'  
 Reverse: 5'-ACTGTCCATTTTCTCCTTCTCTG-3'  
**EPCAM** Forward: 5'-  
 CAATGCAGGGTCTAAAAGCTG-3'  
 Reverse: 5'-CACCCATCTCCTTTATCTCAGC-3'  
**CD133** Forward:  
 5'-GTGGATGCAGAACTTGACAAC-3'  
 Reverse: 5'-ACCCTTTGATACCTGCTACG-3'  
**CD44** Forward:  
 5'-TGGGTGTGTCCTTCGCTCGC-3'  
 Reverse: 5'-GCGGACCGAACCTGGCAGAG-3'  
**CD90** Forward:  
 5'-GAGATCCCAGAACCATGAACC-3'  
 Reverse: 5'-TGCTGGTATTCTCATGGCG-3'

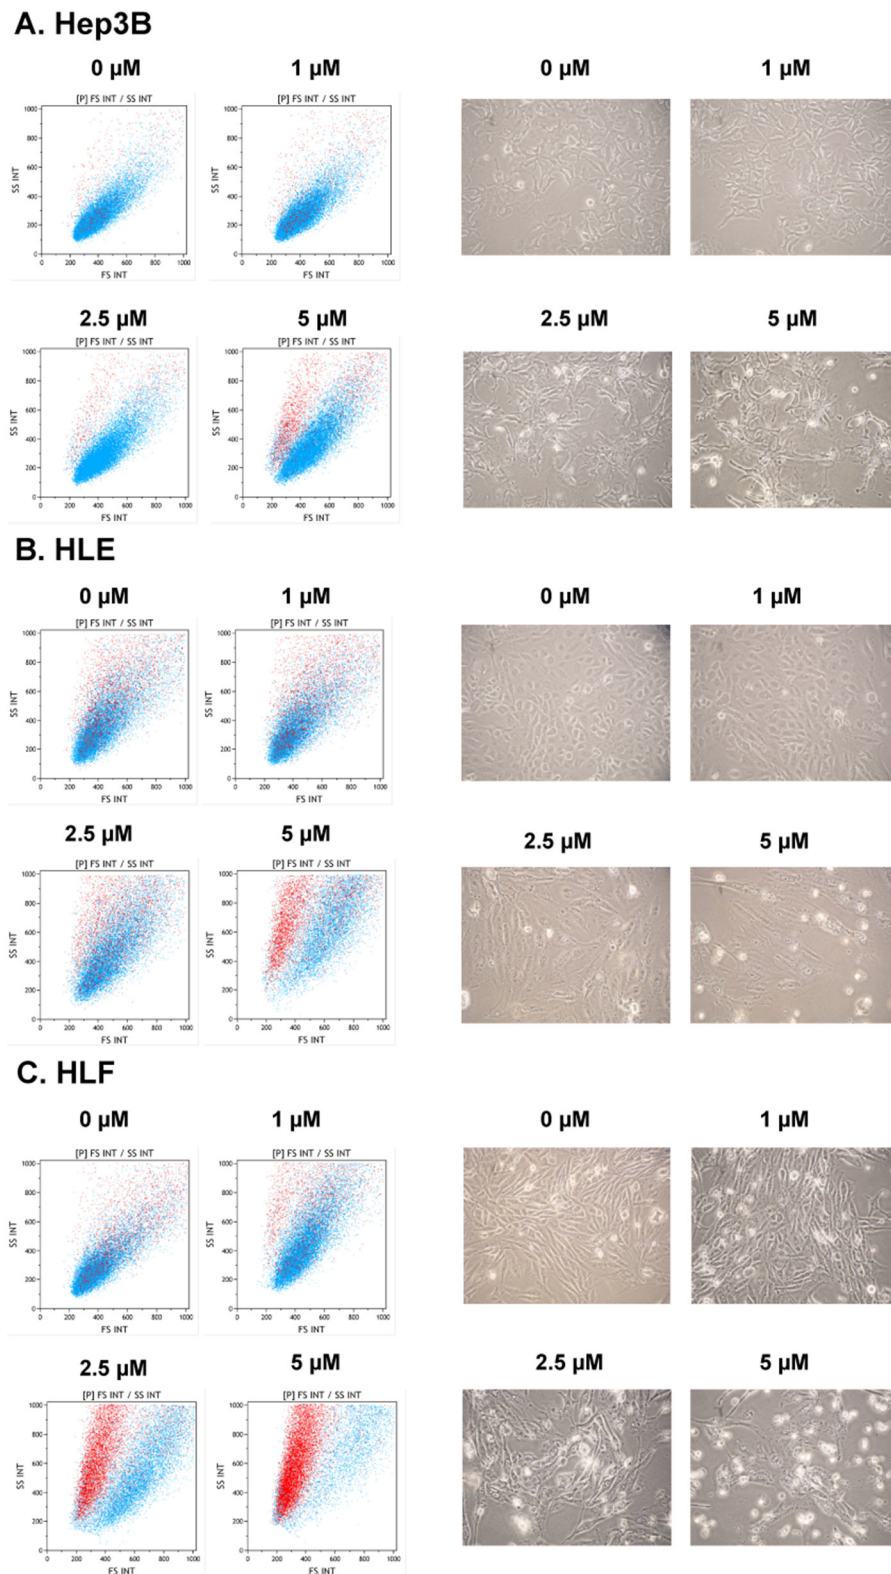

**Supplementary Figure 1: Resminostat induces cell death in HCC cells.** Hep3B (A), HLE (B) and HLF (C) were treated with resminostat (0-5  $\mu$ M) for 72 h. Representative images of flow cytometry analysis of non-viable (PI-positive-red), viable cells (PI-negative-blue) and phase contrast microscopy images are shown.

**A. Hep3B**

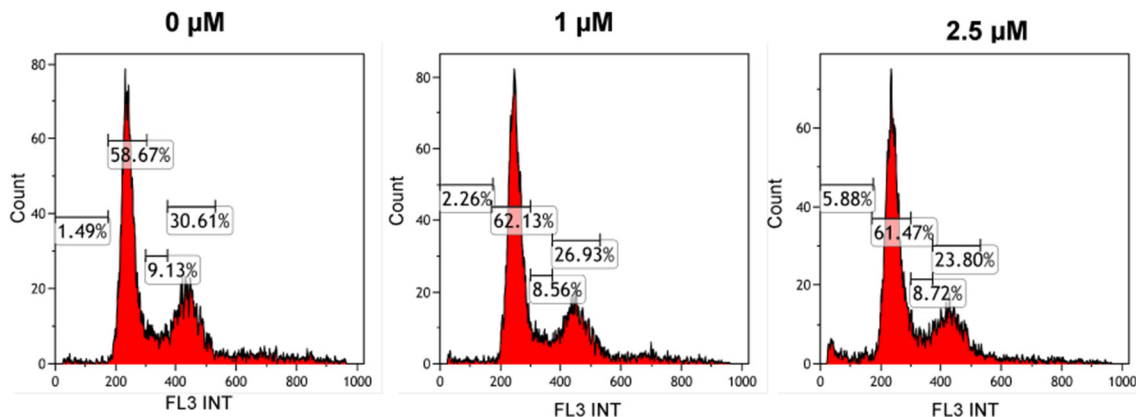

**B. HLE**

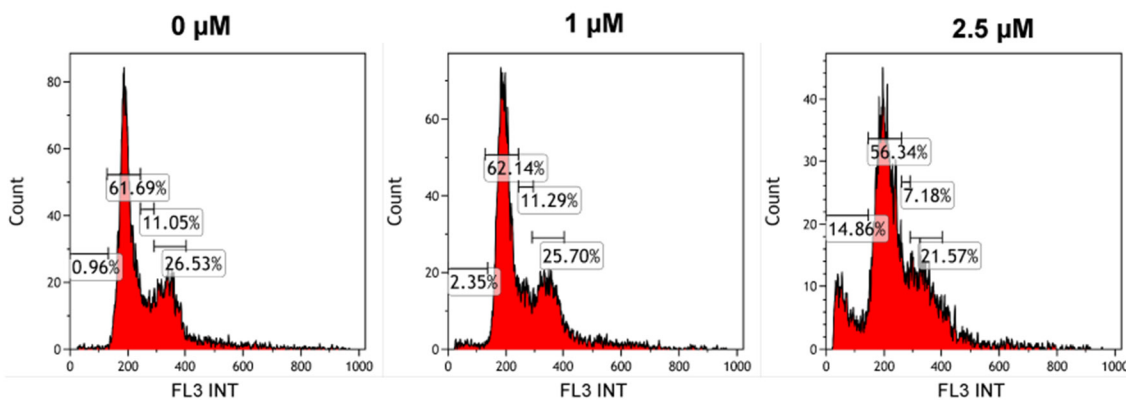

**C. HLF**

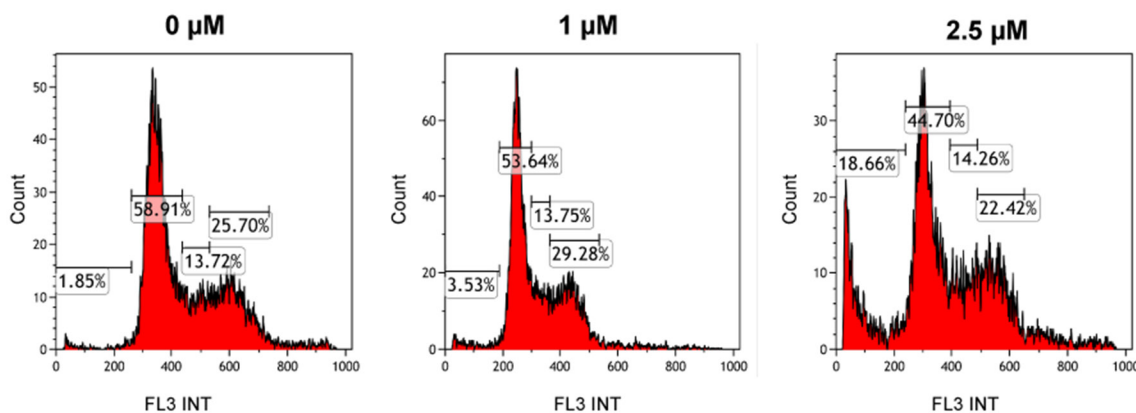

**Supplementary Figure 2: Resminostat induces apoptosis in HCC cells.** Hep3B (A), HLE (B) and HLF (C) were treated with resminostat (0-2.5 μM) for 72 h. Representative plots of cell cycle analysis are shown.

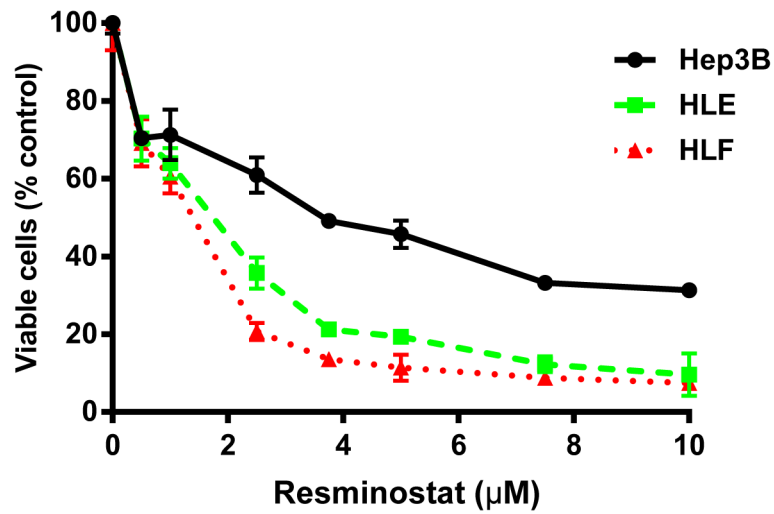

**Supplementary Figure 3: Determination of IC<sub>50</sub> of resminostat in combination with sorafenib (5 µM).** Hep3B, HLE and HLF cells were treated with sorafenib (5 µM) and resminostat in a range of concentrations (0-10 µM). Viable cells were analyzed by crystal violet staining after 72 h of respective treatments and normalized to control. Mean ±SD (n=3).

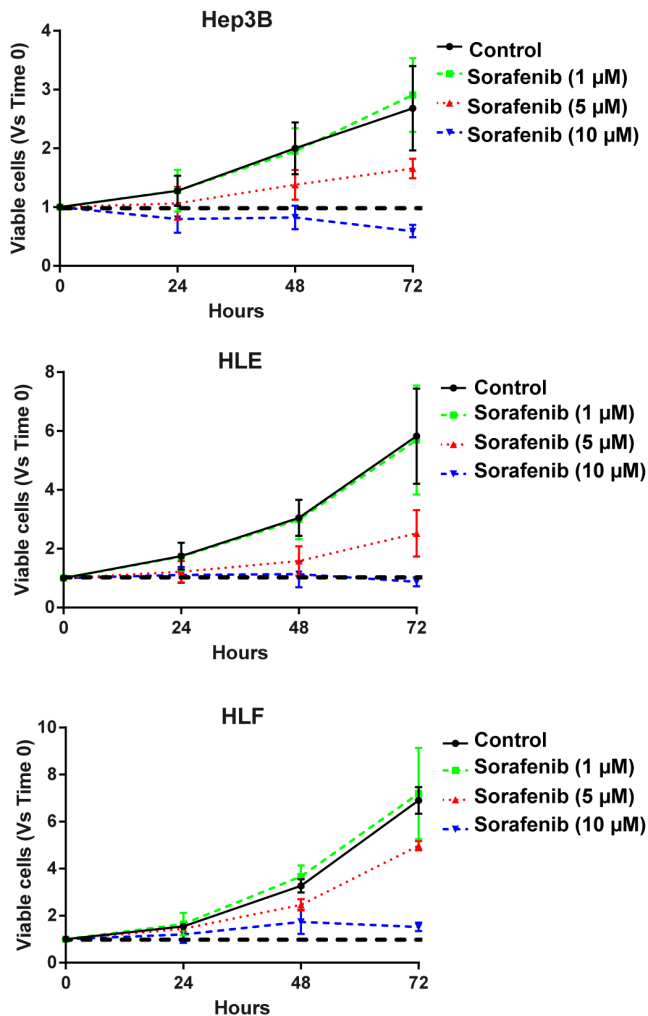

**Supplementary Figure 4: Sorafenib displays cytotoxic effect only in the epithelial Hep3B cells.** Hep3B, HLE and HLF cells were treated with sorafenib in a range of concentrations (0-10 μM). Viable cells were analyzed by crystal violet staining after 24, 48 and 72 h of respective treatments and are represented as viable cells versus time 0. Mean ±SD (n=3).



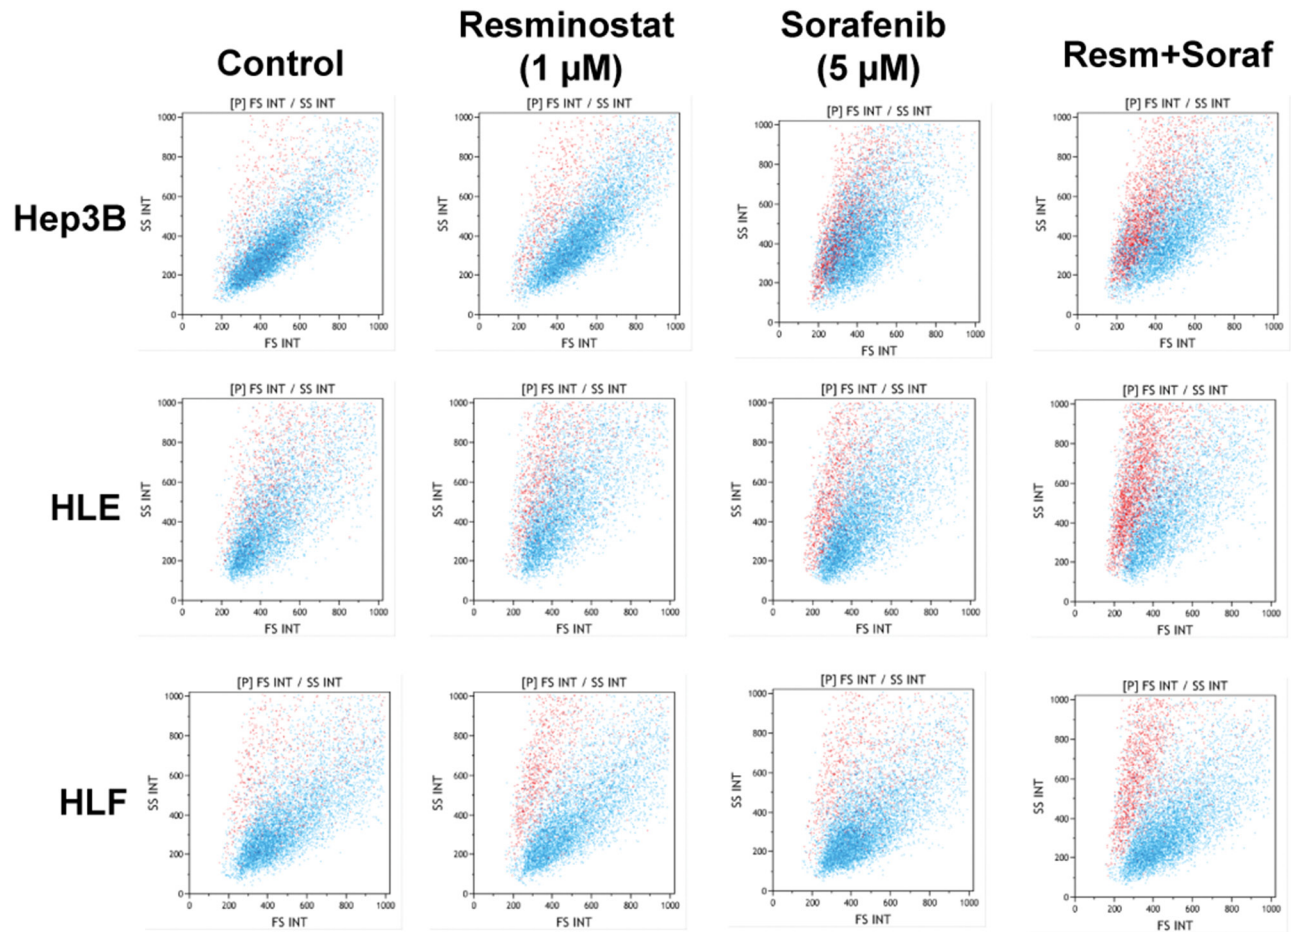

**Supplementary Figure 5: Effect of combined treatment of resminostat and sorafenib.** Hep3B, HLE and HLF cells were treated with resminostat (0 μM), resminostat (1 μM), sorafenib (5 μM) or a combination of resminostat (1 μM) and sorafenib (5 μM) for 72 h. The % of non-viable cells (PI-positive) was determined by flow cytometry. Representative plots are shown.

**A. HLF**

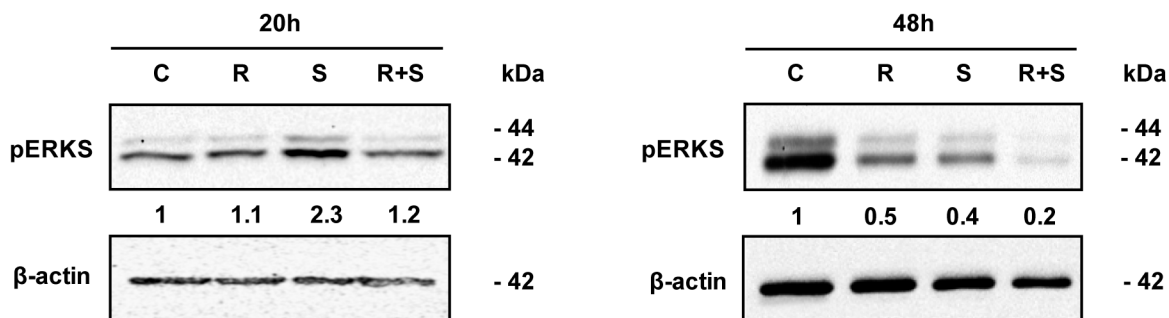

**B. HLF**

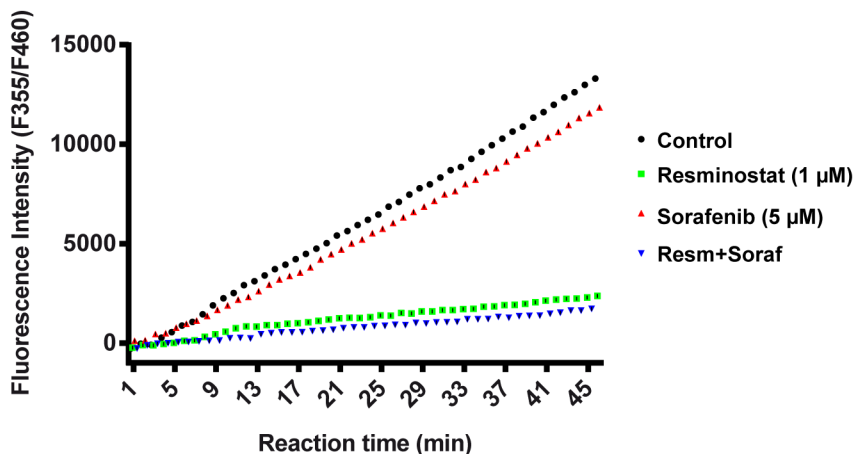

**Supplementary Figure 6: The effect of resminostat and sorafenib treatment on pERKS and HDAC activity.** HLF cells were treated with resminostat (0 μM), resminostat (1 μM), sorafenib (5 μM) or a combination of resminostat (1 μM) and sorafenib (5 μM). **(A)** Western blot analysis of pERKS in HLF cells after 20 h and 48 h or respective treatments. β-actin was used as a loading control. Densitometry analysis is shown below respective bands and is normalized to β-actin. **(B)** HDAC activity was detected by a commercial kit after 24 h of respective treatments and is represented as Fluorescence intensity (F355/F460) over time (min). A representative experiment is shown (n=3).



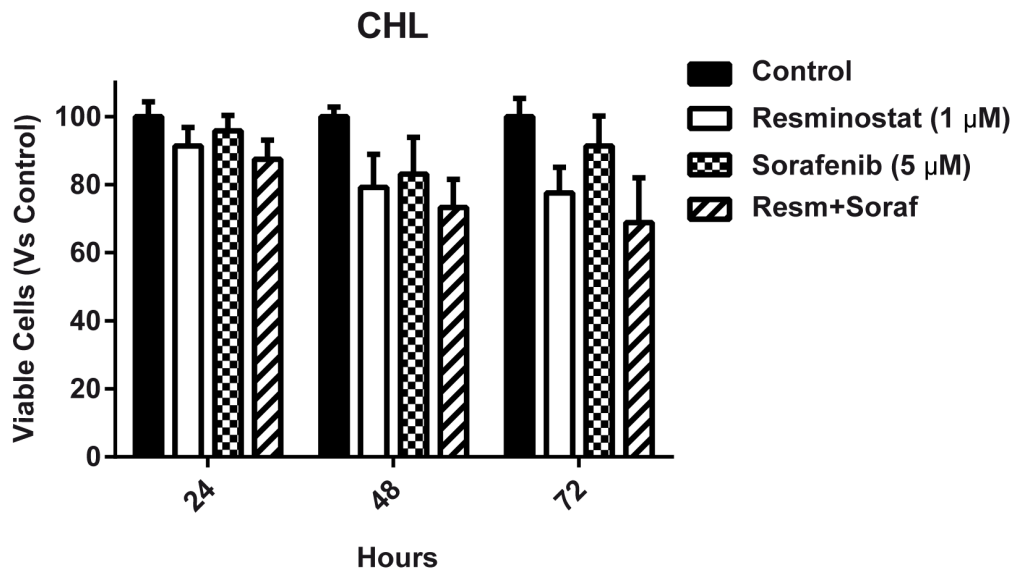

**Supplementary Figure 7: Response of a human liver cell line CCL-13 (Chang liver, CHL) to resminostat, sorafenib or the combination of both drugs.** CHL cells were treated with resminostat (1 μM), sorafenib (5 μM) or a combination of resminostat (1 μM) and sorafenib (5 μM) at respective times. Viable cells were analyzed by crystal violet staining and normalized to control. Mean ±SD (n=3).

**A.**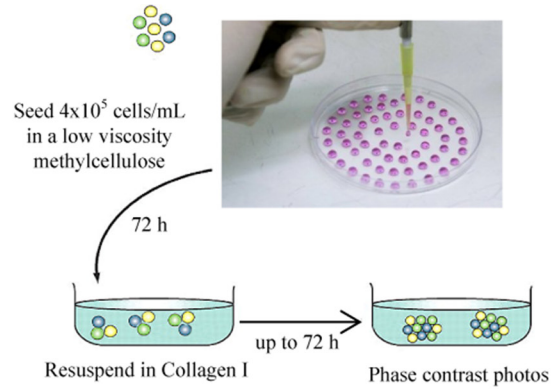**B.**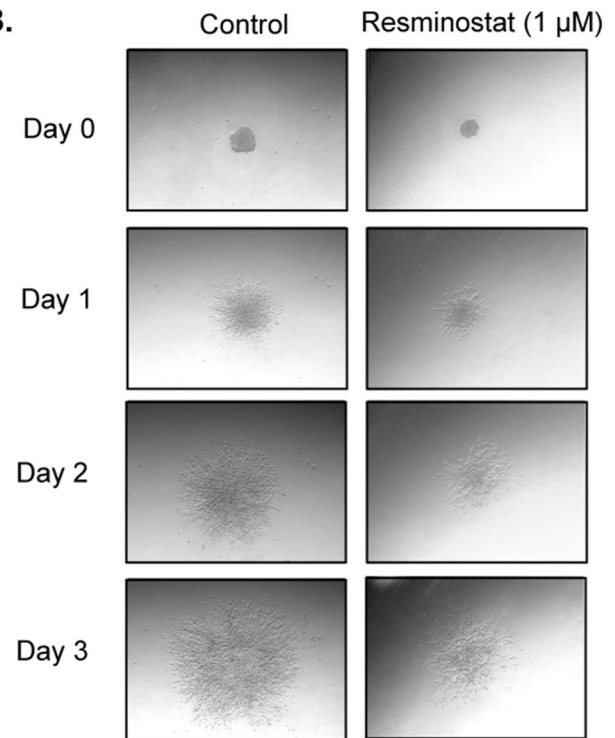

**Supplementary Figure 8: Resminostat treatment decreases the invasive growth ability in HLF cells.** HLF cells were treated with resminostat (1  $\mu$ M) for 72 h. The methodological approach for invasive growth assay is shown (A). Representative phase contrast images at respective time points are shown at magnification 4x (B).
